# Supplementary material for: Independent and relative effects of stress, depressive symptoms, and affect on college students’ daily health behaviors
Source: Springer Nature journal article supplement (doi:10.1007/s10865-018-9945-4), 2018-06-20
Supplement: MOESM1 [file 15863764]

Supplemental Materials

Daily Hassles

Please identify whether any of the following have happened to you in the past day (or since you last completed one of the online daily questionnaires).

| Happened | Did not happen |  |
| --- | --- | --- |
|  |  | Had a conflict or disagreement with a friend. |
|  |  | Had a conflict or disagreement with a family member. |
|  |  | Had a conflict or disagreement with a roommate/housemate. |
|  |  | Had a conflict or disagreement with a significant other. |
|  |  | Had a conflict or disagreement with a professor or teaching assistant. |
|  |  | Had a conflict or disagreement with a coworker. |
|  |  | Made a request for help or assistance that was rejected. |
|  |  | Misplaced or lost something. |
|  |  | Did not have time to do the things I wanted or needed to do. |
|  |  | Was rejected by someone. |
|  |  | Had a problem at work. |
|  |  | Did not have enough money for something I needed (e.g., tuition, food, rent). |
|  |  | Did not have enough money for something I wanted (e.g., going out with friends). |
|  |  | Had a health-related problem (e.g., headache, cramps, or cold, not due to a chronic health condition). |
|  |  | Did poorly on or failed an exam or project. |
|  |  | Had to prepare for an exam or important paper/project. |
|  |  | Had a problem with transportation (e.g., bus or ride was late/hindered by traffic which caused lateness to a class or event, couldn’t get a ride when needed). |
|  |  | Was criticized by someone. |
|  |  | Property was damaged or stolen. |
|  |  | Was embarrassed in public. |
|  |  | Friends were not available when I wanted to socialize. |
|  |  | Personal item broke or malfunctioned and interrupted daily activities (e.g., phone, computer, or laptop problem interfering with schoolwork). |
|  |  | Was ignored by others. |
|  |  | Performed poorly at a task |
|  |  | Other hassle or stressor? Please describe: |
|  |  | Other hassle or stressor? Please describe: |

Maladaptive Health Behaviors Composite Score

Consumption of Fats

0 = 0 servings of fat

1 = 1-2 servings of fat

2 = 3 or more servings of fat

Consumption of Sweets

0 = 0 servings of sweets

1 = 1 serving of sweets

2 = 2 or more servings of sweets

Consumption of Alcohol

0 = 0 servings of alcohol

1 = 3 or fewer servings of alcohol

2 = More than 3 servings of alcohol

Consumption of Cigarettes

0 = 0 cigarettes

1 = 1-20 cigarettes (light or moderate use)

2 = More than 20 cigarettes (heavy use)

Sedentary Behavior.

0 = Sufficient exercise per World Health Organization guidelines

1 = Some exercise

2 = No exercise

Lack of Fruit and Vegetables

0 = Sufficient fruits or vegetables (5 or more servings)

1= Some fruits or vegetables consumed (1-4 servings)

2= No fruits or vegetables

Inadequate Sleep

0 = 7-9 hrs of sleep

1 = 6 OR 10 hrs of sleep

2 = <6 or >10 hrs of sleep
